# Supplementary material for: Metal–support interaction in Pd/CeO2 model catalysts for CO oxidation: from pulsed laser-ablated nanoparticles to highly active state of the catalyst
Source: Royal Society of Chemistry journal article supplement (doi:10.1039/c6cy00319b), 2016-01-01
Supplement: c6cy00319b1.pdf [file c6cy00319b1.pdf]

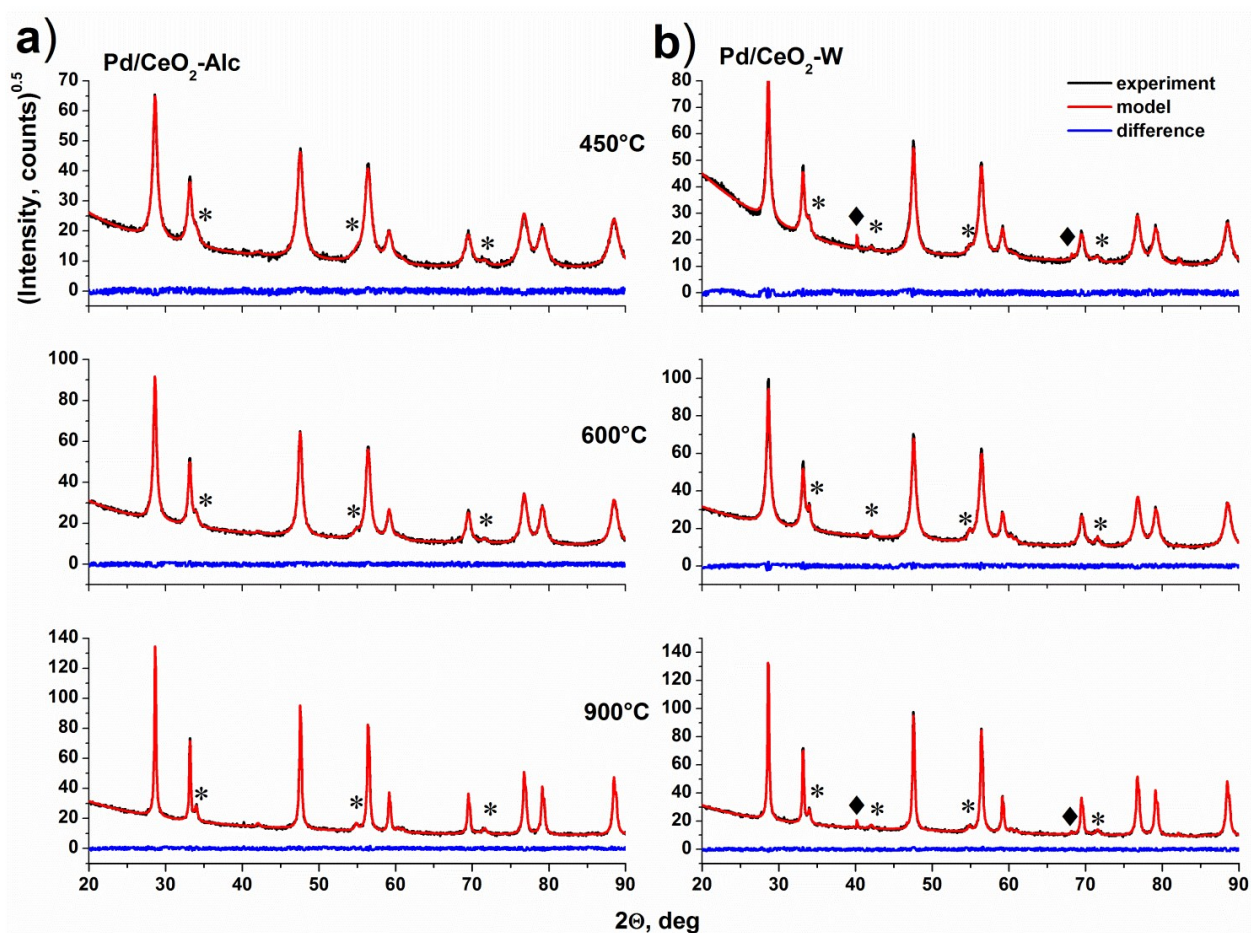

Fig. S1. X-ray diffraction patterns for Pd/CeO<sub>2</sub> catalysts calcined at 450, 600 and 900°C and synthesized by laser ablation in water (a) and ethanol (b). The experimental curves are represented by black solid lines, the fits are represented by red solid lines and the difference curves are shown by blue solid line. X-ray diffraction patterns were registered at the room temperature. Diamonds indicate the reflections of Pd<sup>0</sup>, the asterisks mark PdO, the reflections of CeO<sub>2</sub> are not denoted. The scale of intensity is indicated as I<sup>0.5</sup>.

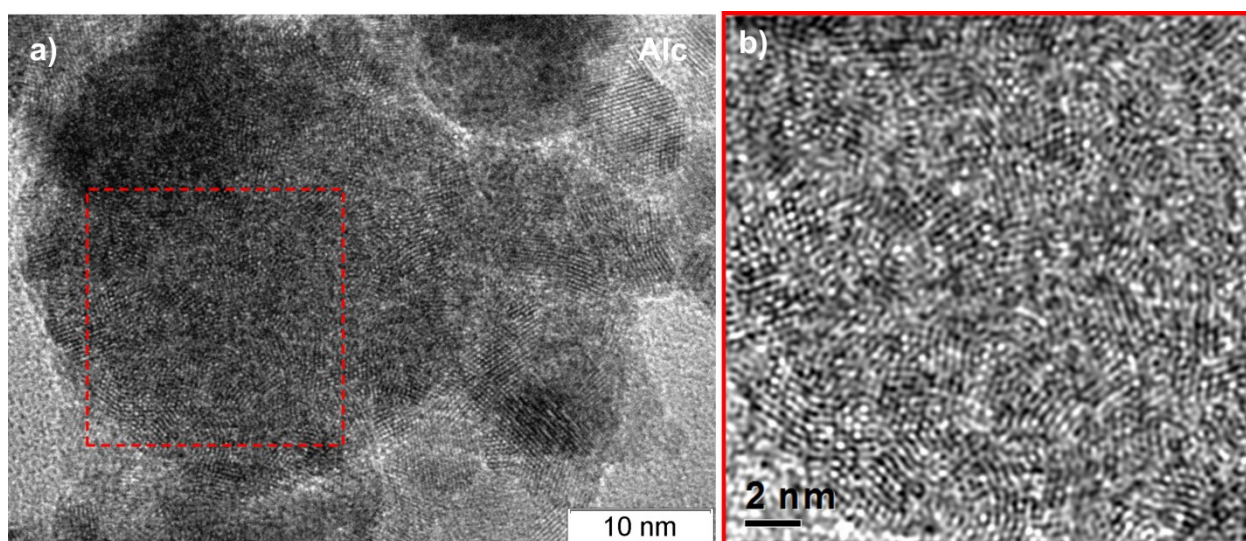

Fig. S2. a) HRTEM image of CeO<sub>2</sub> nanoparticles synthesized by laser ablation in ethanol, b) HRTEM image showing the lattice of CeO<sub>2</sub> nanoparticle marked in fig.(a) after Fourier processing

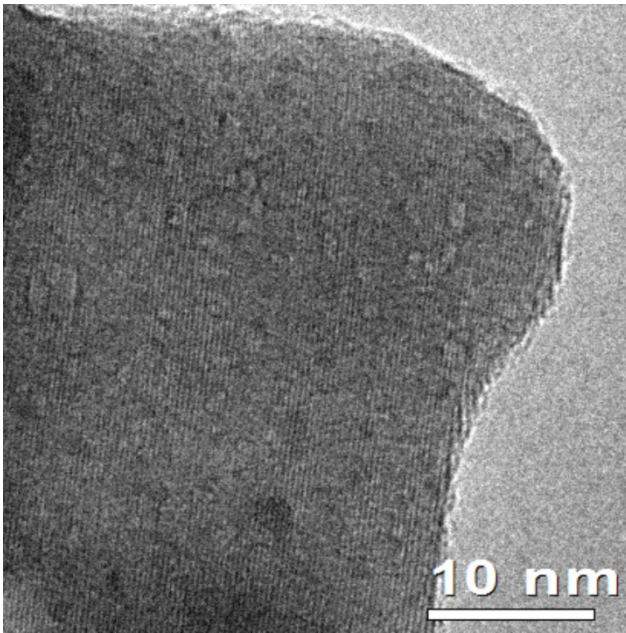

Fig. S3. BF TEM images of Pd/CeO<sub>2</sub>-W-900 catalysts.

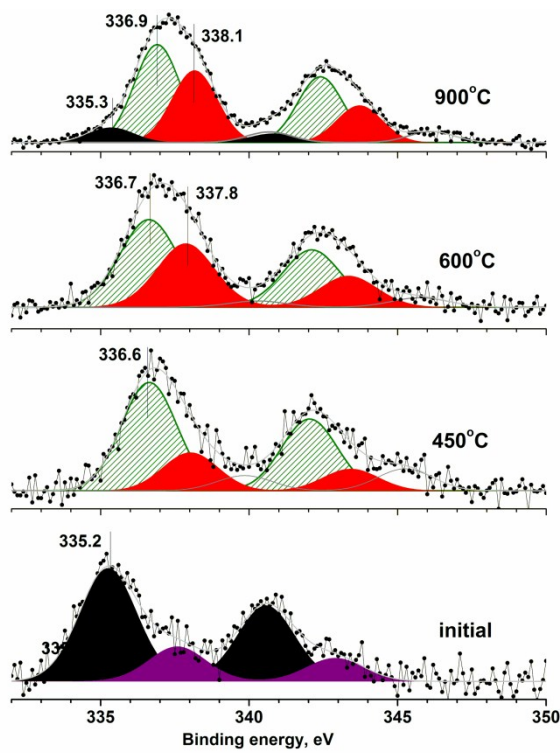

Fig. S4 Pd3d spectra for Pd/CeO<sub>2</sub>-W as-prepared catalysts and catalysts calcined at 450, 600, 900°C.

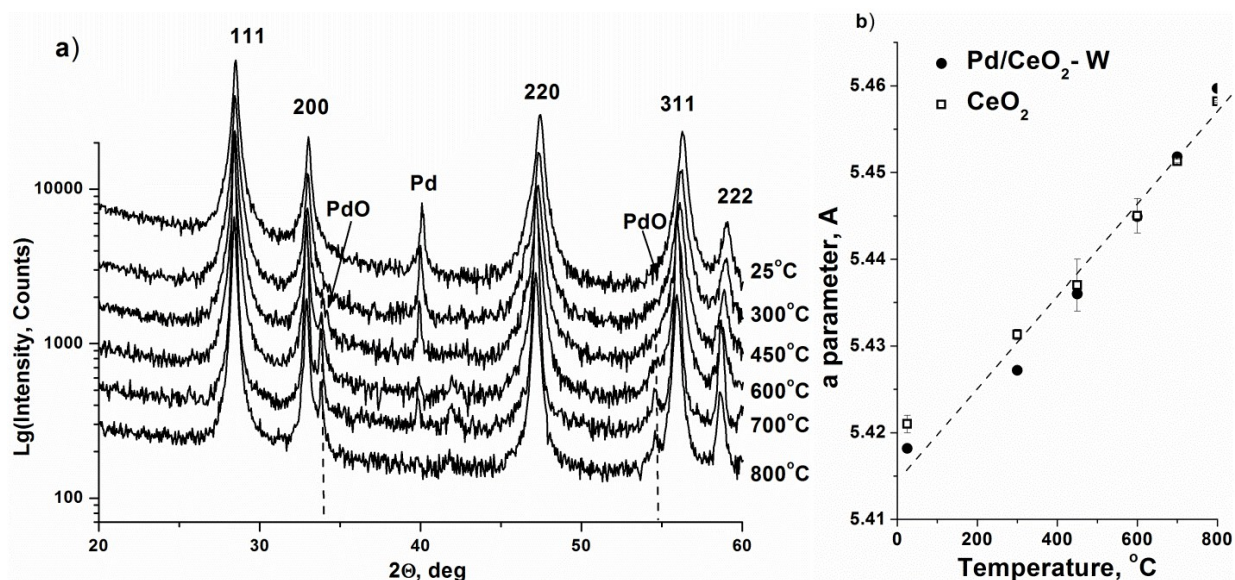

Fig. S5. (a) X-ray diffraction patterns for catalyst Pd/CeO<sub>2</sub>-W obtained using *in situ* - high-temperature reaction chamber during heating in air. (b) The change in the CeO<sub>2</sub> lattice parameter during the heating. Closed circles denote lattice parameter for Pd/CeO<sub>2</sub>-W sample, open squares denote lattice parameter for CeO<sub>2</sub>-W sample.

Table S1. Structural characteristics of Pd/CeO<sub>2</sub>-Alc samples obtained using *in situ* - high-temperature reaction chamber during heating in air.

| T, °C | Structural parameters of the phase with a fluorite structure |         |                |
|-------|--------------------------------------------------------------|---------|----------------|
|       | a, Å                                                         | D, (nm) | e <sub>0</sub> |
| 300   | 5.432(1)                                                     | 8.5(2)  | 0.11(1)        |
| 450   | 5.4398(4)                                                    | 10.5(2) | 0.091(7)       |
| 600   | 5.4499(3)                                                    | 16.4(3) | 0.072(4)       |
| 700   | 5.457(1)                                                     | 17.9(3) | 0.062(4)       |
| 800   | 5.4639(3)                                                    | 20.8(5) | 0.033(4)       |

Table S2. Structural characteristics of Pd/CeO<sub>2</sub>-W samples obtained using *in situ* - high-temperature reaction chamber during heating in air.

| T, °C | Structural parameters of the phase with a fluorite structure |         |                |
|-------|--------------------------------------------------------------|---------|----------------|
|       | a, Å                                                         | D, (nm) | e <sub>0</sub> |
| 25    | 5.4182(4)                                                    | 16(3)   | 0.09(1)        |
| 300   | 5.4272(4)                                                    | 15.4(6) | 0.09(1)        |
| 450   | 5.4360(4)                                                    | 15.9(6) | 0.08(1)        |
| 600   | 5.4449(4)                                                    | 16.9(6) | 0.06(1)        |
| 700   | 5.4518(3)                                                    | 18.4(5) | 0.04(1)        |
| 800   | 5.4597(2)                                                    | 25(1)   | 0.038(5)       |
